# Supplementary material for: Computational prediction of changes in brain metabolic fluxes during Parkinson’s disease from mRNA expression
Source: PubMed Central journal article supplement (PMC6135490; doi:10.1371/journal.pone.0203687), 2018-09-12
Supplement: pone.0203687.s006.pdf [file pone.0203687.s006.pdf]

**Supplementary Figure S3: Reconstructed metabolic reaction network.**

Reactions considered in this model are given in Supplementary Table S1. Reaction names are based on the BiGG database.
