# Supplementary material for: Computational prediction of changes in brain metabolic fluxes during Parkinson’s disease from mRNA expression
Source: PubMed Central journal article supplement (PMC6135490; doi:10.1371/journal.pone.0203687), 2018-09-12
Supplement: pone.0203687.s007.pdf [file pone.0203687.s007.pdf]

# A) SNC data

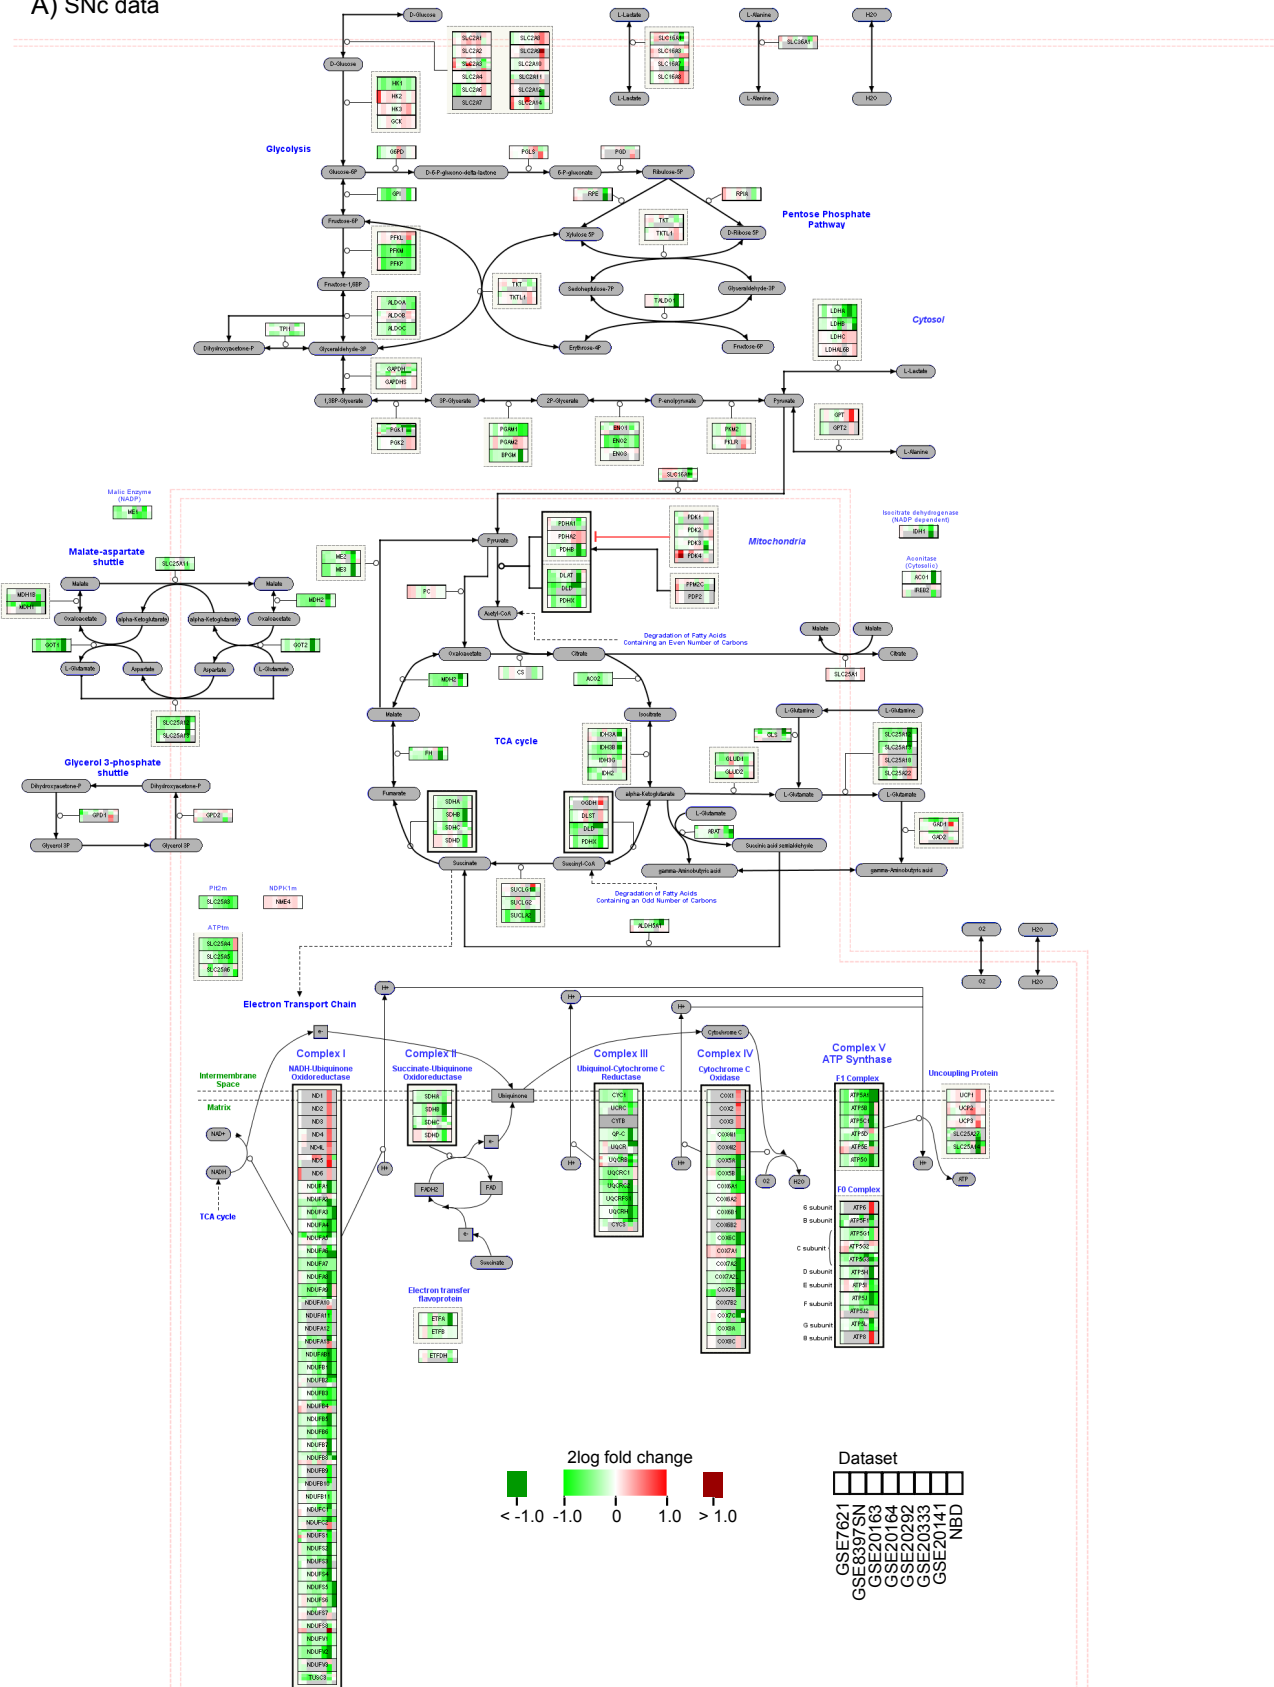

## B) Other tissues

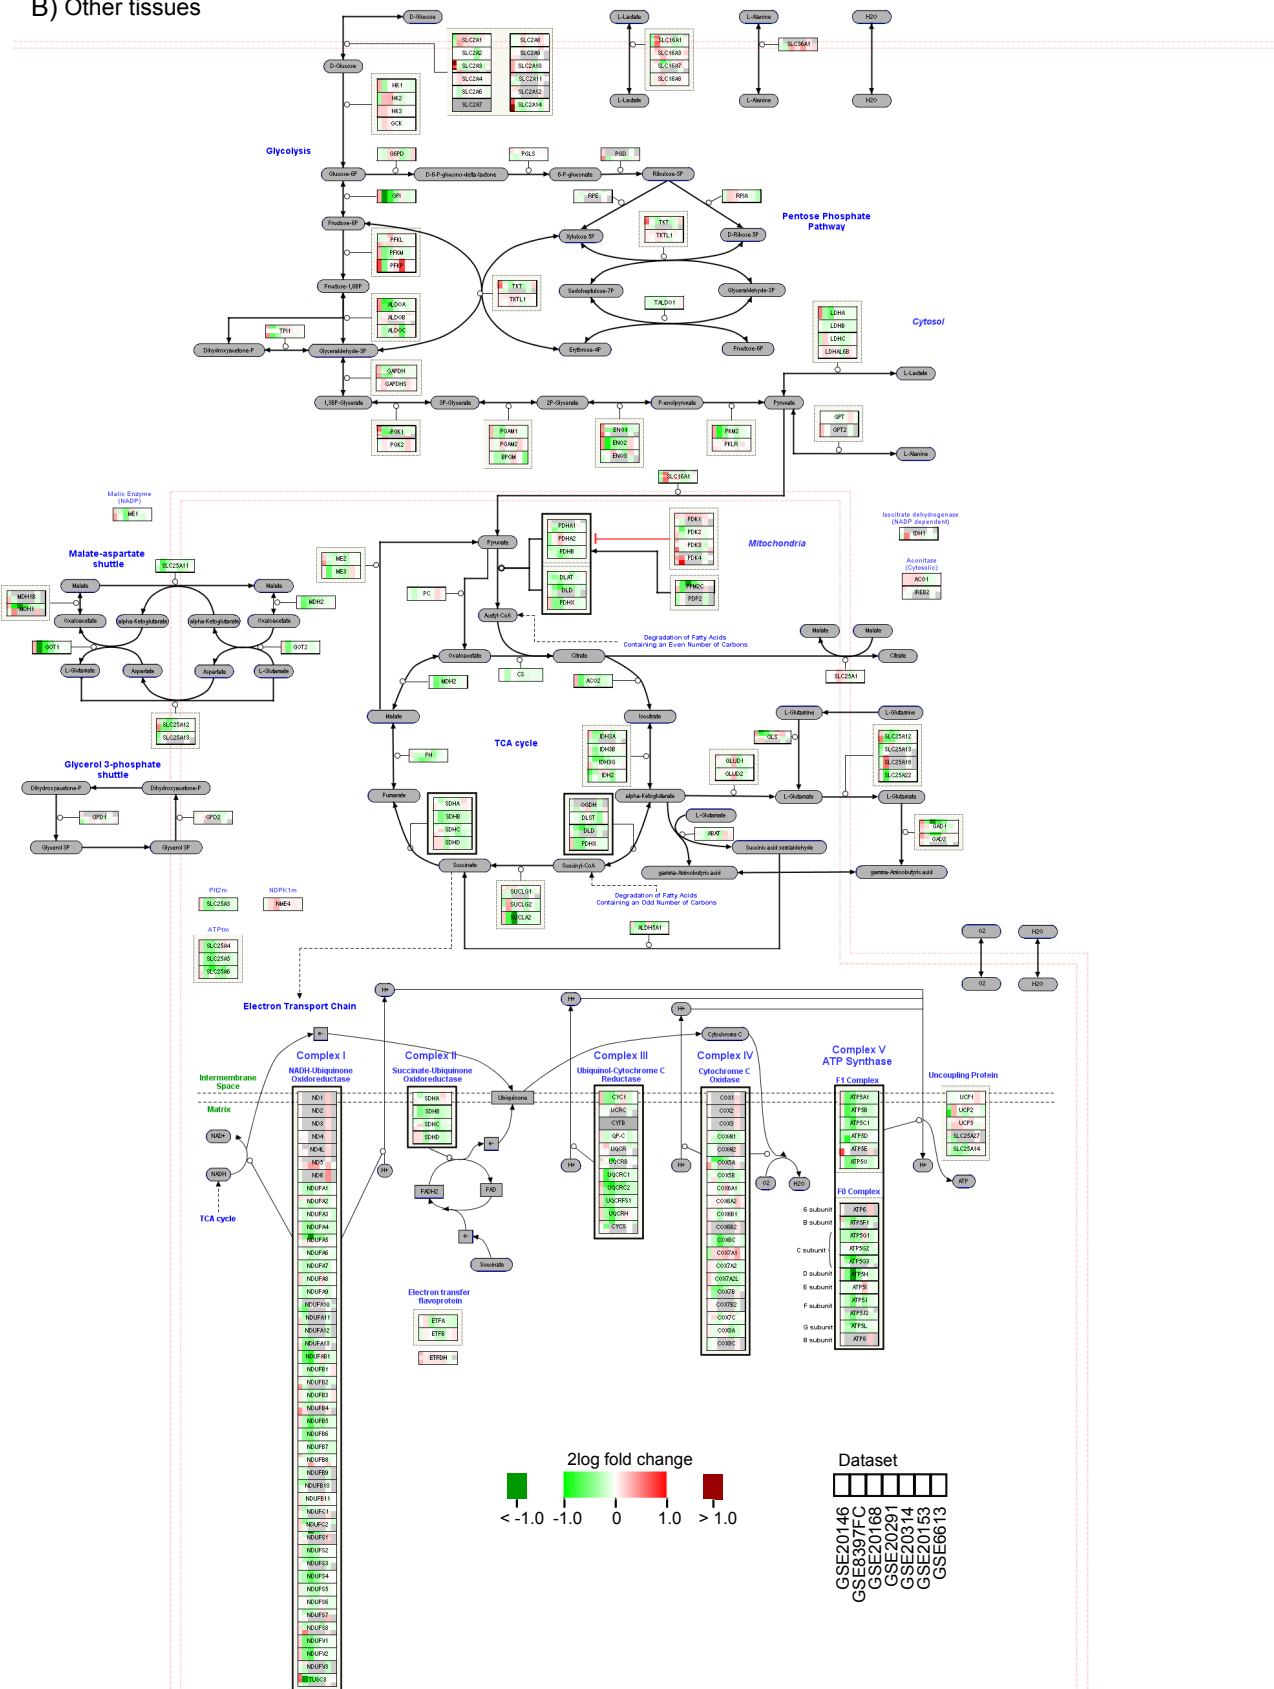

**Supplementary Figure S6: Visualization of fold changes in mRNA expressions are mapped on the metabolic pathway model.**

Each rectangular box represents a gene for a protein involved in a biochemical reaction. Stacks of boxes represent isoforms (several different genes with the same function: enclosed in boxes with dashed borders) or complexes (several gene products together form a large structure: enclosed in boxes with continuous borders). These colored boxes connect the metabolites (rounded boxes with grey filling) in a pathway. The rectangular boxes representing enzymes are filled from left to right with small colored squares with the color coding indicating the fold change measured in the patient groups as shown in the legend. (A) shows the substantia nigra (first 6 from the left) and the remaining two on the right are dopaminergic neurons. (B) shows the other brain regions, from left to right: globus pallidus internus, frontal cortex, Brodmann area 9, putamen, cerebellum, lymphoblastoid cells and blood. Expression colors: green, downregulation; red, upregulation; grey, no expression data available for the associated probesets.
