# Supplementary material for: Computational prediction of changes in brain metabolic fluxes during Parkinson’s disease from mRNA expression
Source: PLoS One. 2018 Sep 12;13(9):e0203687. doi: 10.1371/journal.pone.0203687 (PMC6135490; doi:10.1371/journal.pone.0203687)
Supplement: S2 Table — (XLS) [file pone.0203687.s002.xls]

## Sheet: Sheet1
Supplementary Table S2: List of the metabolites in the model.
Suffix e refers to extracellular compartment, c to cytosol, m to mitochondria.
Metabolite names are from the reconstruction of human metabolism Recon1 in the BiGG database.
No	Metabolite name	Metabolite description	Localisation
1	13dpg_c	1,3-bisphosphoglycerate	cytosol
2	2pg_c	D-Glycerate 2-phosphate	cytosol
3	3pg_c	3-Phospho-D-glycerate	cytosol
4	4abut_c	4-Aminobutanoate	cytosol
5	4abut_m	4-Aminobutanoate	mitochondria
6	6pgc_c	6-Phospho-D-gluconate	cytosol
7	6pgl_c	6-phospho-D-glucono-1,5-lactone	cytosol
8	accoa_m	Acetyl-CoA	mitochondria
9	adp_c	ADP	cytosol
10	adp_m	ADP	mitochondria
11	akg_c	2-Oxoglutarate	cytosol
12	akg_m	2-Oxoglutarate	mitochondria
13	alaL_c	L-Alanine	cytosol
14	alaL_e	L-Alanine	extracellular matrix
15	aspL_c	L-Aspartate	cytosol
16	aspL_m	L-Aspartate	mitochondria
17	atp_c	ATP	cytosol
18	atp_m	ATP	mitochondria
19	cit_m	Citrate	mitochondria
20	co2_c	CO2	cytosol
21	co2_e	CO2	extracellular matrix
22	co2_m	CO2	mitochondria
23	coa_m	Coenzyme A	mitochondria
24	dhap_c	Dihydroxyacetone phosphate	cytosol
25	e4p_c	D-Erythrose 4-phosphate	cytosol
26	etfox_m	Electron transfer flavoprotein oxidized	mitochondria
27	etfrd_m	Electron transfer flavoprotein reduced	mitochondria
28	f6p_c	D-Fructose 6-phosphate	cytosol
29	fad_m	Flavin adenine dinucleotide oxidized	mitochondria
30	fadh2_m	Flavin adenine dinucleotide reduced	mitochondria
31	fdp_c	D-Fructose 1,6-bisphosphate	cytosol
32	ficytC_m	Ferricytochrome C	mitochondria
33	focytC_m	Ferrocytochrome C	mitochondria
34	fum_m	Fumarate	mitochondria
35	g3p_c	Glyceraldehyde 3-phosphate	cytosol
36	g6p_c	D-Glucose 6-phosphate	cytosol
37	gdp_m	GDP	mitochondria
38	glcD_c	D-Glucose	cytosol
39	glcD_e	D-Glucose	extracellular matrix
40	glnL_c	L-Glutamine	cytosol
41	glnL_e	L-Glutamine	extracellular matrix
42	glnL_m	L-Glutamine	mitochondria
43	gluL_c	L-Glutamate	cytosol
44	gluL_m	L-Glutamate	mitochondria
45	glyc3p_c	Glycerol 3-phosphate	cytosol
46	gtp_m	GTP	mitochondria
47	h_c	H+	cytosol
48	h_e	H+	extracellular matrix
49	h_m	H+	mitochondria
50	h2o_c	H2O	cytosol
51	h2o_e	H2O	extracellular matrix
52	h2o_m	H2O	mitochondria
53	hco3_m	Bicarbonate	mitochondria
54	icit_m	Isocitrate	mitochondria
55	lacL_c	L-Lactate	cytosol
56	lacL_e	L-Lactate	extracellular matrix
57	malL_c	L-Malate	cytosol
58	malL_m	L-Malate	mitochondria
59	na1_c	Sodium	cytosol
60	na1_e	Sodium	extracellular matrix
61	nad_c	Nicotinamide adenine dinucleotide	cytosol
62	nad_m	Nicotinamide adenine dinucleotide	mitochondria
63	nadh_c	Nicotinamide adenine dinucleotide - reduced	cytosol
64	nadh_m	Nicotinamide adenine dinucleotide - reduced	mitochondria
65	nadp_c	Nicotinamide adenine dinucleotide phosphate	cytosol
66	nadp_m	Nicotinamide adenine dinucleotide phosphate	mitochondria
67	nadph_c	Nicotinamide adenine dinucleotide phosphate - reduced	cytosol
68	nadph_m	Nicotinamide adenine dinucleotide phosphate - reduced	mitochondria
69	nh4_c	Ammonium	cytosol
70	nh4_e	Ammonium	extracellular matrix
71	nh4_m	Ammonium	mitochondria
72	o2_c	O2	cytosol
73	o2_e	O2	extracellular matrix
74	o2_m	O2	mitochondria
75	o2s_m	Superoxide anion	mitochondria
76	oaa_c	Oxaloacetate	cytosol
77	oaa_m	Oxaloacetate	mitochondria
78	pep_c	Phosphoenolpyruvate	cytosol
79	pi_c	Phosphate	cytosol
80	pi_m	Phosphate	mitochondria
81	pyr_c	Pyruvate	cytosol
82	pyr_e	Pyruvate	extracellular matrix
83	pyr_m	Pyruvate	mitochondria
84	q10_m	Ubiquinone-10	mitochondria
85	q10h2_m	Ubiquinol-10	mitochondria
86	r5p_c	alpha-D-Ribose 5-phosphate	cytosol
87	ru5pD_c	D-Ribulose 5-phosphate	cytosol
88	s7p_c	Sedoheptulose 7-phosphate	cytosol
89	succ_m	Succinate	mitochondria
90	succoa_m	Succinyl-CoA	mitochondria
91	sucsal_m	Succinic semialdehyde	mitochondria
92	xu5pD_c	D-Xylulose 5-phosphate	cytosol
