# Supplementary material for: Computational prediction of changes in brain metabolic fluxes during Parkinson’s disease from mRNA expression
Source: PLoS One. 2018 Sep 12;13(9):e0203687. doi: 10.1371/journal.pone.0203687 (PMC6135490; doi:10.1371/journal.pone.0203687)
Supplement: S5 Table — (XLS) [file pone.0203687.s005.xls]

## Sheet: Sheet1
Supplementary Table S7: Results for flux prediction for other tissues
Metabolic flux in μmol/g wet weight/min for an amount of tissue equivalent to the whole brain. The flux direction is as in Supplementary Table 1, as originally defined in the BiGG database. For instance, the negative value for R_L_LDH_L means that lactate is produced.
Region	Whole brain	Gpi	Frontal C	BA9	Putamen	Cerebellum	Lymphoblastoid	Blood			All except GSE20146		Average FC, BA9
Reaction Name	Normal brain	GSE 20146	GSE 8397_FC	GSE 20168	GSE 20291	GSE 20314	GSE 20153	GSE 6613	Average flux	STDEV	Average flux	STDEV	Average flux	STDEV
R_GLCt1r	0.203	0.235352	0.180734	0.180765	0.20022	0.191234	0.199127	0.197631	0.197866	0.0184493	0.191619	0.00897693	0.18075	2.19839e-05
R_HEX1	0.203	0.235352	0.180734	0.180765	0.20022	0.191234	0.199127	0.197631	0.197866	0.0184493	0.191619	0.00897693	0.18075	2.19839e-05
R_PGI	0.188993	0.223276	0.152422	0.155389	0.181288	0.183585	0.183401	0.182989	0.180336	0.0233569	0.173179	0.0149805	0.153906	0.00209791
R_PFK	0.198331	0.231326	0.171297	0.172307	0.193909	0.188684	0.193885	0.192751	0.192023	0.0199239	0.185472	0.0107659	0.171802	0.000713961
R_FBA	0.198331	0.231326	0.171297	0.172307	0.193909	0.188684	0.193885	0.192751	0.192023	0.0199239	0.185472	0.0107659	0.171802	0.000713961
R_TPI	0.198331	0.231326	0.171297	0.172307	0.193909	0.188684	0.193885	0.192751	0.192023	0.0199239	0.185472	0.0107659	0.171802	0.000713961
R_GAPD	0.401331	0.466678	0.352031	0.353072	0.394129	0.379918	0.393012	0.390382	0.389889	0.0383246	0.377091	0.0196639	0.352552	0.000735945
R_PGK	-0.401331	-0.466678	-0.352031	-0.353072	-0.394129	-0.379918	-0.393012	-0.390382	-0.389889	0.0383246	-0.377091	0.0196639	-0.352552	0.000735945
R_PGM	-0.401331	-0.466678	-0.352031	-0.353072	-0.394129	-0.379918	-0.393012	-0.390382	-0.389889	0.0383246	-0.377091	0.0196639	-0.352552	0.000735945
R_ENO	0.401331	0.466678	0.352031	0.353072	0.394129	0.379918	0.393012	0.390382	0.389889	0.0383246	0.377091	0.0196639	0.352552	0.000735945
R_PYK	0.401331	0.466678	0.352031	0.353072	0.394129	0.379918	0.393012	0.390382	0.389889	0.0383246	0.377091	0.0196639	0.352552	0.000735945
R_PYRt2r	-0.0024	-0.0391424	0.0364353	0.012618	0.00483648	-0.00859501	-0.00724092	-0.00383304	-0.000703088	0.023021	0.00570347	0.0170643	0.0245267	0.0168413
R_PYRt2m	0.389731	0.386525	0.386119	0.334278	0.37509	0.380037	0.372743	0.376665	0.373065	0.0178968	0.370822	0.0184955	0.360198	0.036657
R_L_LACt2r	-0.0092	-0.0410103	-0.00234756	-0.031412	-0.0238756	0.0087133	-0.0130285	-0.00988414	-0.0161207	0.0171675	-0.0119724	0.014461	-0.0168798	0.0205516
R_LDH_L	-0.0092	-0.0410103	-0.00234756	-0.031412	-0.0238756	0.0087133	-0.0130285	-0.00988414	-0.0161207	0.0171675	-0.0119724	0.014461	-0.0168798	0.0205516
R_G6PDH2r	0.014007	0.0120752	0.0283119	0.0253761	0.0189316	0.0076495	0.0157264	0.0146424	0.0175304	0.00728863	0.0184396	0.00753692	0.026844	0.00207593
R_PGL	0.014007	0.0120752	0.0283119	0.0253761	0.0189316	0.0076495	0.0157264	0.0146424	0.0175304	0.00728863	0.0184396	0.00753692	0.026844	0.00207593
R_GND	0.014007	0.0120752	0.0283119	0.0253761	0.0189316	0.0076495	0.0157264	0.0146424	0.0175304	0.00728863	0.0184396	0.00753692	0.026844	0.00207593
R_RPE	0.009338	0.00805013	0.0188746	0.0169174	0.012621	0.00509967	0.0104843	0.00976157	0.011687	0.00485909	0.0122931	0.00502461	0.017896	0.00138395
R_RPI	-0.004669	-0.00402507	-0.0094373	-0.00845869	-0.00631052	-0.00254983	-0.00524213	-0.00488079	-0.00584348	0.00242954	-0.00614654	0.00251231	-0.00894799	0.000691976
R_TKT1	0.004669	0.00402507	0.0094373	0.00845869	0.00631052	0.00254983	0.00524213	0.00488079	0.00584348	0.00242954	0.00614654	0.00251231	0.00894799	0.000691976
R_TKT2	0.004669	0.00402507	0.0094373	0.00845869	0.00631052	0.00254983	0.00524213	0.00488079	0.00584348	0.00242954	0.00614654	0.00251231	0.00894799	0.000691976
R_TALA	0.004669	0.00402507	0.0094373	0.00845869	0.00631052	0.00254983	0.00524213	0.00488079	0.00584348	0.00242954	0.00614654	0.00251231	0.00894799	0.000691976
R_PDHm	0.378731	0.385471	0.350933	0.31393	0.354853	0.35753	0.362808	0.363329	0.355551	0.0214726	0.350564	0.0185581	0.332431	0.0261654
R_CSm	0.378731	0.385471	0.350933	0.31393	0.354853	0.35753	0.362808	0.363329	0.355551	0.0214726	0.350564	0.0185581	0.332431	0.0261654
R_ACONTm	0.378731	0.385471	0.350933	0.31393	0.354853	0.35753	0.362808	0.363329	0.355551	0.0214726	0.350564	0.0185581	0.332431	0.0261654
R_ICDHxm	0.378731	0.385471	0.350933	0.31393	0.354853	0.35753	0.362808	0.363329	0.355551	0.0214726	0.350564	0.0185581	0.332431	0.0261654
R_AKGDm	0.302771	0.32235	0.229241	0.242926	0.267983	0.232572	0.27929	0.288006	0.266052	0.0337668	0.256669	0.0250743	0.236083	0.00967663
R_SUCOAS1m	-0.302771	-0.32235	-0.229241	-0.242926	-0.267983	-0.232572	-0.27929	-0.288006	-0.266052	0.0337668	-0.256669	0.0250743	-0.236083	0.00967663
R_SUCD1m	0.367731	0.384417	0.315747	0.293581	0.334616	0.335023	0.352874	0.349994	0.338036	0.0288909	0.330306	0.0223536	0.304664	0.0156738
R_FUMm	0.367731	0.384417	0.315747	0.293581	0.334616	0.335023	0.352874	0.349994	0.338036	0.0288909	0.330306	0.0223536	0.304664	0.0156738
R_MDHm	0.744472	0.796498	0.470334	0.505905	0.610787	0.62182	0.68857	0.709871	0.629112	0.114641	0.601214	0.0960908	0.488119	0.0251523
R_ME2m	0.01539	0	0.152747	0.0858167	0.0714476	0.100972	0.0442874	0.0206206	0.0679845	0.0516877	0.0793153	0.0461248	0.119282	0.0473272
R_PCm	0.02639	0.00105429	0.187933	0.106165	0.091685	0.123479	0.0542216	0.0339563	0.0854992	0.0621375	0.0995734	0.0544922	0.147049	0.0578188
R_CO2t	-1.15459	-1.16743	-1.19867	-1.03263	-1.1347	-1.1587	-1.1385	-1.11192	-1.13465	0.0527438	-1.12919	0.0555656	-1.11565	0.117408
R_CO2tm	-1.07562	-1.09329	-1.08385	-0.956602	-1.04914	-1.0486	-1.04919	-1.03529	-1.04514	0.0443433	-1.03711	0.0426444	-1.02023	0.0899814
R_ASPTAm	-0.392131	-0.412082	-0.307334	-0.29814	-0.347619	-0.387769	-0.379984	-0.380498	-0.359061	0.0429158	-0.350224	0.039423	-0.302737	0.00650112
R_ASPTA	0.392131	0.412082	0.307334	0.29814	0.347619	0.387769	0.379984	0.380498	0.359061	0.0429158	0.350224	0.039423	0.302737	0.00650112
R_MDH	-0.392131	-0.412082	-0.307334	-0.29814	-0.347619	-0.387769	-0.379984	-0.380498	-0.359061	0.0429158	-0.350224	0.039423	-0.302737	0.00650112
R_ASPGLUm	0.392131	0.412082	0.307334	0.29814	0.347619	0.387769	0.379984	0.380498	0.359061	0.0429158	0.350224	0.039423	0.302737	0.00650112
R_AKGMALtm	0.392131	0.412082	0.307334	0.29814	0.347619	0.387769	0.379984	0.380498	0.359061	0.0429158	0.350224	0.039423	0.302737	0.00650112
R_G3PD1	0	-0.0135862	-0.0423496	-0.0235199	-0.0226351	-0.000862548	0	0	-0.0147076	0.0159695	-0.0148945	0.0174853	-0.0329348	0.0133146
R_G3PD2m	0	0.0135862	0.0423496	0.0235199	0.0226351	0.000862548	0	0	0.0147076	0.0159695	0.0148945	0.0174853	0.0329348	0.0133146
R_NDPK1m	-0.302771	-0.32235	-0.229241	-0.242926	-0.267983	-0.232572	-0.27929	-0.288006	-0.266052	0.0337668	-0.256669	0.0250743	-0.236083	0.00967663
R_GLNtN1	-0.011	-0.00105429	-0.0351858	-0.0203484	-0.0202374	-0.0225069	-0.00993418	-0.0133357	-0.0175147	0.0107897	-0.0202581	0.00874534	-0.0277671	0.0104916
R_GLNS	0.13686	0.134756	0.15886	0.140791	0.143048	0.133399	0.133162	0.137763	0.140254	0.00901851	0.14117	0.00951557	0.149825	0.0127766
R_GLNtm	0.12586	0.133701	0.123674	0.120443	0.122811	0.110892	0.123228	0.124427	0.122739	0.00670541	0.120912	0.00509079	0.122058	0.002285
R_GLUNm	0.12586	0.133701	0.123674	0.120443	0.122811	0.110892	0.123228	0.124427	0.122739	0.00670541	0.120912	0.00509079	0.122058	0.002285
R_GLUDym	-0.011	-0.00105429	-0.0351858	-0.0203484	-0.0202374	-0.0225069	-0.00993418	-0.0133357	-0.0175147	0.0107897	-0.0202581	0.00874534	-0.0277671	0.0104916
R_GLUt2m	-0.20182	-0.196823	-0.245366	-0.191447	-0.209681	-0.23585	-0.206747	-0.19975	-0.212238	0.0204839	-0.214807	0.0211676	-0.218406	0.038127
R_GLUDC	0.06496	0.0620671	0.0865065	0.0506556	0.0666331	0.102451	0.0735845	0.0619872	0.0719836	0.0174333	0.0736363	0.0184867	0.0685811	0.0253504
R_4ABUTtm	0.06496	0.0620671	0.0865065	0.0506556	0.0666331	0.102451	0.0735845	0.0619872	0.0719836	0.0174333	0.0736363	0.0184867	0.0685811	0.0253504
R_ABTArm	0.06496	0.0620671	0.0865065	0.0506556	0.0666331	0.102451	0.0735845	0.0619872	0.0719836	0.0174333	0.0736363	0.0184867	0.0685811	0.0253504
R_SSALxm	0.06496	0.0620671	0.0865065	0.0506556	0.0666331	0.102451	0.0735845	0.0619872	0.0719836	0.0174333	0.0736363	0.0184867	0.0685811	0.0253504
R_ALATA_L	0	0	0	0	0	0	0	0	0	0	0	0	0	0
R_H2Ot	-6.76454	-7.14352	-5.47048	-5.2412	-6.06537	-6.03433	-6.388	-6.4646	-6.11536	0.638031	-5.944	0.491772	-5.35584	0.162124
R_H2Otm	-6.37722	-6.68892	-5.14676	-4.91351	-5.69017	-5.66206	-6.01071	-6.08886	-5.743	0.597069	-5.58535	0.467988	-5.03013	0.164936
R_ATPtm	5.38723	5.67195	4.22062	4.09897	4.75304	4.68691	5.06081	5.13553	4.80397	0.545115	4.65931	0.425196	4.15979	0.08602
R_PIt2m	5.38723	5.67195	4.22062	4.09897	4.75304	4.68691	5.06081	5.13553	4.80397	0.545115	4.65931	0.425196	4.15979	0.08602
R_O2t	1.1187	1.17493	0.923022	0.872223	1.00618	1.00389	1.05997	1.06826	1.0155	0.0995663	0.988924	0.0772337	0.897623	0.0359203
R_O2tm	1.1187	1.17493	0.923022	0.872223	1.00618	1.00389	1.05997	1.06826	1.0155	0.0995663	0.988924	0.0772337	0.897623	0.0359203
R_NADH2u10m	1.86966	1.95186	1.48795	1.42734	1.65511	1.6719	1.76706	1.78652	1.67825	0.179915	1.63265	0.146204	1.45765	0.0428523
R_CYORu10m	2.2374	2.34986	1.84604	1.74445	2.01236	2.00779	2.11994	2.13652	2.03099	0.199133	1.97785	0.154467	1.79525	0.0718407
R_CYOOm3	1.1187	1.17493	0.923022	0.872223	1.00618	1.00389	1.05997	1.06826	1.0155	0.0995663	0.988924	0.0772337	0.897623	0.0359203
R_ATPS4m	5.11085	5.35065	4.17931	3.96221	4.57674	4.57782	4.83574	4.88148	4.62342	0.461742	4.50221	0.363928	4.07076	0.153515
R_ETF	0.367731	0.398003	0.358097	0.317101	0.357251	0.335885	0.352874	0.349994	0.352744	0.0246966	0.3452	0.0159357	0.337599	0.0289884
R_ETFQO	0.367731	0.398003	0.358097	0.317101	0.357251	0.335885	0.352874	0.349994	0.352744	0.0246966	0.3452	0.0159357	0.337599	0.0289884
R_NH3tm	-0.11486	-0.132647	-0.0884883	-0.100094	-0.102573	-0.0883847	-0.113294	-0.111091	-0.105225	0.0155379	-0.100654	0.0106887	-0.0942912	0.00820661
R_NH4t3r	-0.022	-0.00210858	-0.0703716	-0.0406968	-0.0404747	-0.0450139	-0.0198684	-0.0266713	-0.0350293	0.0215794	-0.0405161	0.0174907	-0.0555342	0.0209832
